# Supplementary material for: Training of professional caregivers in the management of psychological and behavioural symptoms of patients suffering from neurocognitive pathologies through virtual reality: Feasibility study, caregiver satisfaction and training effectiveness
Source: Research Square preprint supplement (doi:10.21203/rs.3.rs-1728060/v1), 2022-07-01
Supplement: Supplementary file 1 [file cbf1e7f96ac140f4415d294f.docx]

**Article title**

Training of professional caregivers in the management of psychological and behavioural symptoms of patients suffering from neurocognitive pathologies through virtual reality: Feasibility study, caregiver satisfaction and training effectiveness.

**Journal name**

Journal of Medical Systems (topic: Research)

**Author names and affiliations**

Hermine Lenoir,1,2,3 Maribel Pino,1,2,3 Sebastien Dacunha,1,2,3 & Anne-Sophie Rigaud 1,2,3

1. Université Paris Cité, Maladie d’Alzheimer, F-75013 Paris, France
2. Service Gériatrie 1&2. Centre Mémoire de Ressources et Recherche Ile de France-Broca, APHP, Hôpital Broca, F-75013 Paris, France
3. Broca Living Lab, CEN STIMCO, 75013 Paris, France.

**Email address and ORCID of the corresponding author**

Corresponding author : Hermine Lenoir – [hermine.lenoir@aphp.fr](mailto:hermine.lenoir@aphp.fr)

ORCID: [https://orcid.org/0000-0003-4923-5591](https://orcid.org/0000-0003-4923-5591?lang=en)

**APPENDIX**

1. **Verbal and non-verbal communication training needs questionnaire**

1. In the course of your professional practice, are you regularly in contact with patients with disruptive behavioral problems (agitation, aggressiveness, opposition, etc.)?

Yes, occasionally 🞏 Yes, all the time or frequently 🞏 No 🞏

2. In your professional training, have you ever dealt with the particularities of patients with Alzheimer's disease or related disorders?

Yes 🞏 No 🞏

1. Have you ever had difficulty communicating with a patient with Alzheimer's disease?

Yes 🞏 No 🞏

3.a. If so, in what type of situation? -----------------------------------------------------------------

----------------------------------------------------------------------------------------------------------------

-----------------------------------------------------------------------------------------------------------------

3.b. And what did you do to overcome these difficulties? ---------------------------------

----------------------------------------------------------------------------------------------------------------

-----------------------------------------------------------------------------------------------------------------

1. In your professional training, have you been trained to verbal and non-verbal communication techniques with patients with Alzheimer's disease and/or related disorders?

Yes 🞏 No 🞏

1. If you have attended at least one of these training sessions, what teaching tools or methods were offered to you?

Theoretical course 🞏

Pedagogical game (role play) 🞏

Clinical case study and discussion 🞏

Training via a digital tool (video games, internet training, virtual reality, etc.) 🞏

Other 🞏 , please specify ----------------------------------------------------------------------------------

1. Do you feel the need to improve your knowledge and skills by taking a training course on how to manage difficult situations with patients suffering from psycho-behavioral disorders such as: agitation, aggression, opposition, etc.?

Yes 🞏 No 🞏

1. If yes, by what means would you like to acquire these skills/knowledge (rank from 1 4 according to your preference):

Theoritical course 🞏

Clinical case study and discussion 🞏

Educational game (role-playing) 🞏

Training via a digital tool (video games, web-based training, virtual reality, etc.) 🞏

Other 🞏 , please specify ----------------------------------------------------------------------------------

**2. Example of a scenario**

The sentences the sentences surrounded with a thin line correspond to the inappropriate responses or attitudes of the virtual caregiver to the requests or attitudes of the virtual patient. The sentences the sentences surrounded with a thick line, correspond to the attitudes and ways of answering recommended to attenuate the disturbing psycho-behavioral symptoms of the patients suffering from Alzheimer type diseases.

Mrs. H. is hospitalized in an acute geriatric unit. She suffers from Alzheimer's disease. She has an uninhibited behavior and becomes easily aggressive, especially since her language problems dose not aloud her expressing herself properly.

She is angry at lunchtime because she has only been given a spoon and not the other cutlery. She suddenly burst into the hallway of the ward, very angry, repeating: "*only a spoon, only a spoon, and where are my cutlery, I ask for my culetrery*".

The nurse and a nurse's aide rush to Mrs H. who continues to shout. MG, the care assistant, not understanding what Mrs H. is asking for, tells her: « *stop shouting in the corridor, I don't understand what you are saying, calm down first. Culetrery? Culetrery, what is that? »* She shrugs her shoulders and walks away.

Mrs H., getting even more upset, tries to hit the care assistant, MG. The latter dodges the blow, and leaves in anger. Fifteen minutes later, after a coffee break, MG, the care assistant, returns to the unit. Mrs. H. calls out to her again, asking « *where are my culetry*? » MG, the caregiver, still not understanding what Mrs. T. is asking for, says to her, lowering her voice, in a calm and composed tone, and articulating well: « *Hello again Mrs. H., ... I understand that you need something.. Show me what you need?* »

Mrs. H. then holds up her teaspoon and lunch plate. MG realizes that there is indeed some cutlery missing. She says, « *You're right, Mrs. H., I didn't realize that the cutlery was missing. I'll bring them to you right away* ». MG, the caregiver, observes Mrs. H. who has already calmed down a bit, smiles at her and puts her hand on Mrs. H.'s shoulder to reassure her: « *You can rest easy. My colleague brings you the cutlery*. »
